# Supplementary material for: Evaluation of 16S rDNA-Based Community Profiling for Human Microbiome Research
Source: PLoS One. 2012 Jun 13;7(6):e39315. doi: 10.1371/journal.pone.0039315 (PMC3374619; doi:10.1371/journal.pone.0039315)
Supplement: Protocol S1 — HMP 3730 16S Protocol Version 1.1. (PDF) [file pone.0039315.s001.pdf]

## HMP 3730 16S Protocol Version 1.1

**PURPOSE:** This protocol describes the protocol for clone-based clinical sample sequencing on the ABI3730 platform

**SOURCE OF SAMPLES:** DNA provided by Baylor or Washington University clinical sites

### PRODUCTION SPECIFICATIONS:

#### 1. Notes

- a. Three PCR reactions (technical replicates) are produced for each sample. These replicates are to be pooled *prior* to gel purification
- b. Elution of final product from the gel purification step is in 35µl of PCR Grade Water
- c. A positive control will be included along with the negative control for each set of core mixes set up to be documented by capturing a digital image
- d. The use of alternative conditions can/should be tried if PCR products are not obtained using the primary protocol. These are listed in Part III: Alternative Amplification Conditions
- e. Optimal Electroporator settings may depend on the equipment being used
- f. **Take all reasonable precautions to prevent contamination throughout this process.** This includes:
  - i. Setting up PCR reactions in a designated clean PCR area (with a laminar flow hood equipped with UV light).
  - ii. Wiping down the PCR workspace with 10% bleach followed by dH2O and exposing to UV after each use.
  - iii. Wearing gloves and disposable lab coats at all times when working in the designated PCR area.

#### 2. PCR Reactions (Three technical replicate PCR rxns should be performed for each sample)

##### a. Primers:

27f-MP 5' AGRGTTTGATCMTGGCTCAG 3'

1492r-MP 5' TACGGYTACCTTGTTAYGACTT 3'

*All quantifications are completed using a NanoDrop 1000*

##### b. PCR mix per sample:

|                                                                         |               |
|-------------------------------------------------------------------------|---------------|
| PCR Water (MO Bio Certified DNA-Free #17000)                            | 1.90ul        |
| 2X Pre-Mix D, E or F (Epicentre Fail Safe PCR System)*                  | 5.00ul        |
| 1.2uM Primer 27f MP                                                     | 1.00ul        |
| 1.2uM Primer 1492r-MP                                                   | 1.00ul        |
| Platinum Taq DNA Polymerase High Fidelity(5U/ul)<br>(Invitrogen #11304) | 0.10ul        |
| DNA template (1µl)                                                      | <u>1.00ul</u> |
|                                                                         | 10.00ul       |

\* Epicentre Fail Safe PCR System Pre-Mixes: 100 mM Tris-HCl (pH 8.3, 22°C), 100 mM KCl, 400 µM of each dNTP. The concentrations of MgCl<sub>2</sub> (3-7 mM) and Fail-Safe PCR Enhancer (0-8X) vary with the individual mixes.

(<http://www.epibio.com/item.asp?id=294>)

**Currently we have been using Buffer “E.”**

**3. Controls (to be set up with each core mix)**

- a. To confirm absence of contaminants, prepare a control reaction following above recipe, replacing 1.0ul DNA template with 1.0ul PCR Grade Water. This negative control should be set up with each core mix
- b. To confirm the efficacy of the reagents and reaction conditions, prepare a positive control (e.g. gDNA from an organism amplifiable with the primers being used for PCR). The positive control should be set up with each core mix.
- c. To document the controls 10% of the reaction (1 µl) should be run on an agarose gel along with sample reactions and preserved as a digital image

**4. PCR Cycling :**

96°C 5min. 1X  
94°C 30sec.  
57°C 1min.        }  
72°C 2min.        } 30 cycles  
72°C 7min. 1X  
4°C Hold

**5. Tailing Reaction:**

- a. After amplification place tubes on ice and add 1 U of Taq DNA polymerase, recombinant (Invitrogen SKU# 10342) per tube.
- b. Mix well
- c. Incubate at 72°C for 8-10 minutes (do not cycle)

**6. Check PCR Products of Samples and Controls**

- a. Run 1.0µl of each reaction including positive and negative controls on an agarose gel (e.g. 1.2% Egel (Invitrogen, SKU # G5018-01))
- b. Use 1KB ladder as marker (e.g. Invitrogen, SKU# 15615)
- c. Document the gel by photo/digital image

**7. Gel Purification**

- a. Prior to gel purification, pool all three PCR technical replicates representing one sample into one reaction for gel purification
- b. Prepare a preparative 1.2% agarose gel w/ EtBr (0.01µg/ml final concentration) and load dye (e.g., Invitrogen BlueJuice™ Gel Loading Buffer (10X) SKU# 10816-015 (bromophenol blue) at a 1X concentration (one part loading buffer to nine parts sample).
- c. Run gel at ~5-6 v-cm ~half the length of the gel. On a dark reader (Clare Chemical Research, Transilluminator DR-45M transilluminator) excise bands using clean razor blade.

- d. Continue clean up of PCR product with QIAquick Gel Extraction Kit (Qiagen, Cat# 28704). Follow manufacturer protocol:  
<http://www1.qiagen.com/literature/handbooks/literature.aspx?id=1000252>
- e. Excised bands typically weigh between ~ 100-150mg. We omit the isopropanol wash. Elutions are done with PCR grade water.
- f. Use 35µl PCR grade water for elution. Wait ~3minutes after adding water for elution before the final spin.
- g. If products are dilute they can be concentrated by reducing the volume of water using a speed vac.

## 8. 16S rDNA Cloning

**Technical replicate cloning reactions can be set up for each sample as needed to produce sufficient clones for sequencing**

TOPO TA Cloning® Cloning Kit (pCR®4-TOPO® Invitrogen, cat # K4580)  
[http://tools.invitrogen.com/content/sfs/manuals/topotaseq\\_man.pdf](http://tools.invitrogen.com/content/sfs/manuals/topotaseq_man.pdf)

Typical TOPO TA cloning reaction:

|                                                 |             |
|-------------------------------------------------|-------------|
| 16s PCR product (~75ng)                         | X ul        |
| Salt solution (diluted 1:4 for electroporation) | 1.0 ul      |
| pCR®4-TOPO vector                               | 1.0 ul      |
| dH2O                                            | <u>Y ul</u> |
|                                                 | 6.0 ul      |

X = 0.5-4ul PCR product

Y = 6-(2+X) volume of H2O

- a. incubate reaction @ 22C for 30min
- b. electroporate for transformation (e.g. Bio Rad Gene Pulser II Electroporation System- electroporator settings: 1.75 kV, 200 ohms, 25uF. These settings may need to be changed depending on the electroporator being used) with electrocompetent *E.coli* (TOP10) cells and 2ul of TOPO rxn as directed
- c. recover cells with 250 µl S.O.C. medium
- d. shake solution for 1hr @ 37C
- e. (JCVI: after shaking/incubation, 160 µl 50% glycerol is added (460 µl total))
- f. plate on pre-warmed LB agar w/ 50 µg/ml kanamycin
- g. For testing JCVI plates two plates - one with 50 µl transformation plated and one with 5 µl transformation plated w/ 20 µl SOC
- h. incubate @ 37C ~16hrs (Typical Titers are from ~50- 150 CFU/µl)
- i. Prep for sequencing with default sequencing protocols used at each center

## 9. Sequencing primers:

M13 F and M13R as given in cloning manual

## 10. Alternative Amplification Conditions

If the initial PCR reaction does not produce an amplification product or produces a product that is insufficient for further processing the following steps may be taken in an effort to acquire a product.

All changes to PCR protocols should be tracked.

- a.** Repeat default PCR protocol if still unsuccessful proceed to step 2
- b.** Increase the amount of template in the PCR reaction and increase amount of HiFi Taq polymerase
- c.** Use 2.5ul template/0.3µl HiFi Taq
- d.** Use 5ul template/0.3µl HiFi Taq
- e.** Other options suggested are:
  - i. Alternative Taq Polymerase
  - ii. Different Epicentre Buffer
  - iii. Increase the number of cycles
